# Supplementary material for: Niosomes for Topical Application of Antioxidant Molecules: Design and In Vitro Behavior
Source: MDPI journal article supplement (doi:10.3390/gels9020107), 2023-01-26
Supplement: s1 [file s1]

Supplementary Material

# Niosomes for Topical Application of Antioxidant Molecules: Design and In Vitro Behavior

Maddalena Sguizzato <sup>1</sup>, Alessia Pepe <sup>2</sup>, Anna Baldisserotto <sup>3</sup>, Riccardo Barbari <sup>3</sup>, Leda Montesi <sup>3</sup>, Markus Drechsler <sup>4</sup>, Paolo Mariani <sup>2</sup> and Rita Cortesi <sup>1,5,\*</sup>

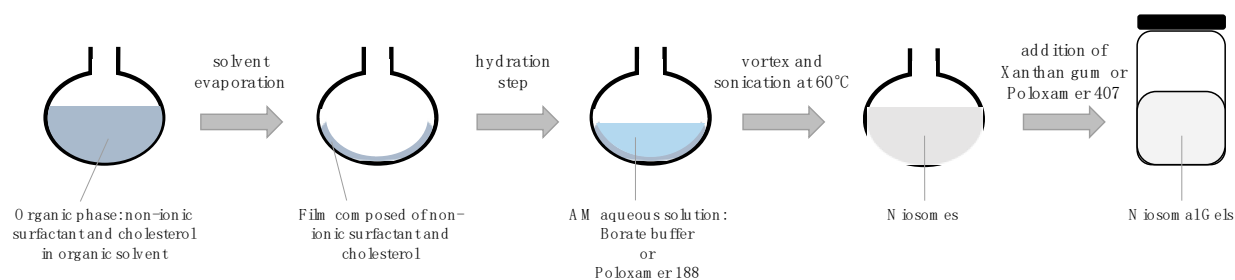

**Figure S1.** Graphical diagram of the production steps of niosomes and niosomal gels.
